# Supplementary material for: Nuclear Lipid Droplet Birth during Replicative Stress
Source: MDPI journal article supplement (doi:10.3390/cells11091390), 2022-04-20
Supplement: s1 [file s1]

**A**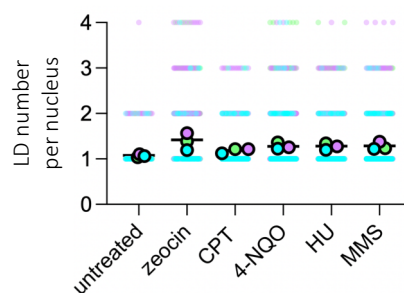**B**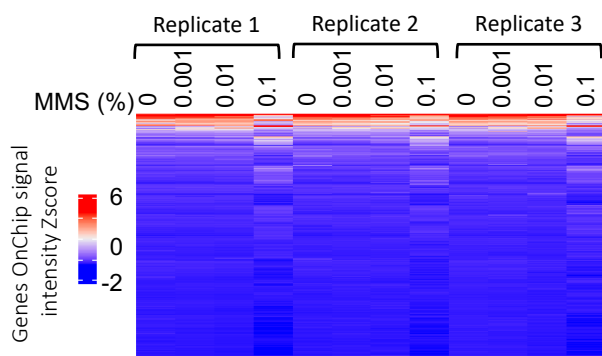**C**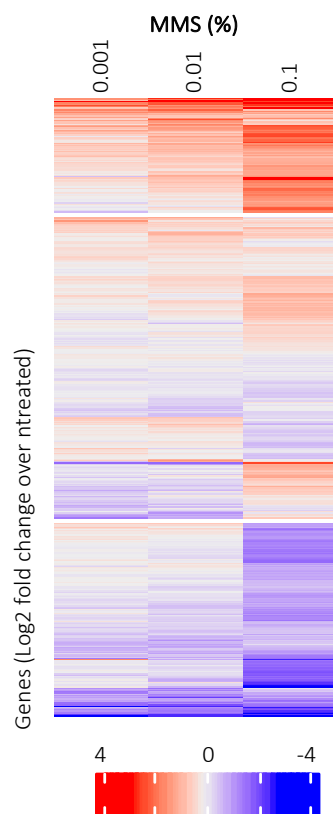**D**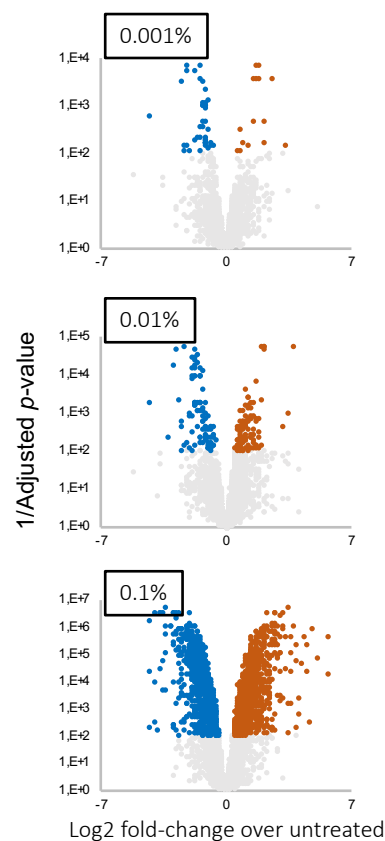**E**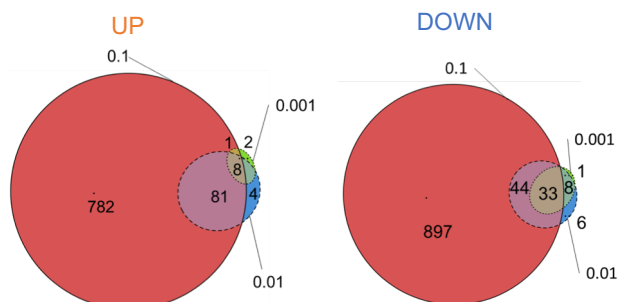**F**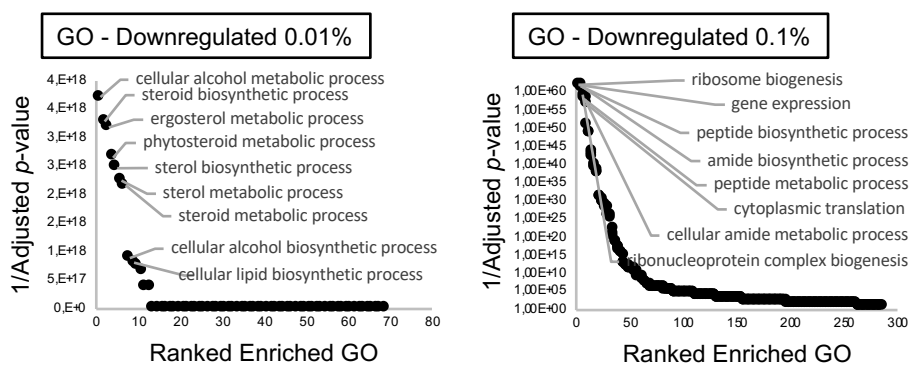**H**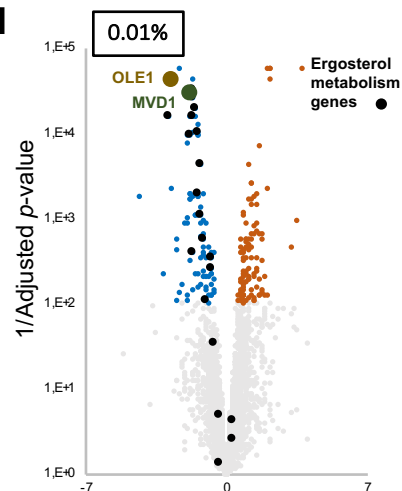**G**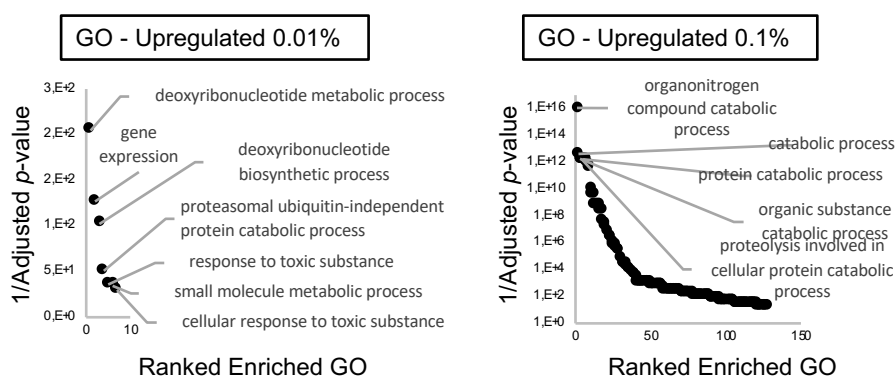**I**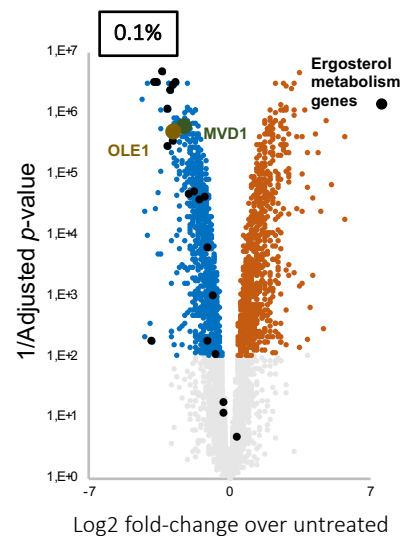

**Figure S1.** MMS treatment triggers a downregulation of the fatty acid unsaturation and sterol transcriptional network

**A.** The number of lipid droplets in individual nuclei of *S. cerevisiae* cells treated as indicated was counted and plotted. Each dot of a light color refers to one nucleus. At least 300 nuclei were considered per condition and experiment. Three independent experiments were performed. To account for reproducibility, each experiment is shown in a different color. Darker, bigger dots indicate the mean of each experiment. The horizontal black line indicates the mean of the means.

**B.** Heatmaps of chip average signal intensity for every gene after normalization and filtering to visualize the three replicates. See also [Table S1](#).

**C.** Heatmaps of gene expression upon MMS treatment. Scale represents the averaged Log2 fold-change over untreated samples of the three considered independent experiments. See also [Table S2-4](#).

**D.** Volcano plots of all genes in response of the three doses of MMS. Fold-changes were computed from the average RNA signal of MMS-treated samples *versus* the average RNA signal of untreated samples. Adjusted *p*-values were computed with the Limma software [9] and corrected for multiple tests. Genes with significant changes according to Adjusted *p*-value are depicted in color, with upregulated ones in orange and downregulated ones in blue. The considered MMS dose is indicated above each graph.

**E.** Venn Diagrams representing the overlap between the three doses of MMS in absolute numbers. Left: upregulated genes. Right: downregulated genes.

**F, G.** Overrepresentation test on downregulated genes (F) or the upregulated ones (G) upon 0.01%- and 0.1%-MMS treatment. Enrichment is computed with Fisher's test and corrected for multiple testing by false discovery rate.  $1/\text{Adjusted } p\text{-values}$  for all enriched pathways are represented. The top pathways are annotated. See also [Table S5-9](#).

**H, I.** Volcano plots of all genes in response to 0.01% MMS and 0.1% MMS. Fold-changes are computed from the average RNA signal of MMS-treated samples versus the average RNA signal of untreated ones. Adjusted *p*-values were computed with the Limma software [9] and corrected for multiple tests. Genes with significant changes according to the adjusted *p*-values are depicted in color, where upregulated ones are shown in orange and downregulated ones in blue. Genes annotated as related to ergosterol metabolism are annotated and depicted in black. *OLE1* and *MVD1* are represented in brown and green, respectively. See also [Table S2-4](#).
